# Supplementary material for: Both pre-frailty and frailty increase healthcare utilization and adverse health outcomes in patients with type 2 diabetes mellitus
Source: Cardiovasc Diabetol. 2018 Sep 27;17:130. doi: 10.1186/s12933-018-0772-2 (PMC6158921; doi:10.1186/s12933-018-0772-2)
Supplement: Supplementary file 1 — Additional file 1: Table S1. Sensitivity analyses consisting of different ranges of data for identifying frailty. [file 12933_2018_772_MOESM1_ESM.doc]

**Additional file 1: Table S1**. Sensitivity analyses consisting of different ranges of data for identifying frailty

| **Variables** | **Number of events** | **Person-year** | **Incidence densitya** | **Crude HR** | | **Modelb** | |
| --- | --- | --- | --- | --- | --- | --- | --- |
| **HR** | **95% CI** | **HR** | **95% CI** |
| *Using preceding 3 years of DM diagnosis* | |  |  |  |  |  |  |
| *Mortality* | |  |  |  |  |  |  |
| Number of frailty components |  |  |  |  |  |  |  |
| 0 | 28,610 | 1,605,211.72 | 17.82 | 1 | – | 1 | – |
| 1 | 12,090 | 298,551.38 | 40.5 | 2.27 | 2.23–2.32c | 1.05 | 1.03–1.08c |
| 2 | 2,843 | 29,262.31 | 97.16 | 5.46 | 5.25–5.67c | 1.16 | 1.11–1.21d |
| ≥ 3 | 399 | 2,258.05 | 176.7 | 9.94 | 9.00–10.97c | 1.15 | 1.04–1.27d |
| Every 1 component increase |  |  |  | 2.27 | 2.24–2.3c | 1.06 | 1.04–1.08c |
| *Cardiovascular events* | |  |  |  |  |  |  |
| Number of frailty components |  |  |  |  |  |  |  |
| 0 | 30,869 | 1,544,307.67 | 19.99 | 1 | – | 1 | – |
| 1 | 11,649 | 276,652.3 | 42.11 | 2.1 | 2.05–2.14c | 1.07 | 1.05–1.1c |
| 2 | 2,445 | 24,872.25 | 98.3 | 4.83 | 4.64–5.03c | 1.21 | 1.16–1.27c |
| ≥ 3 | 246 | 1,803.87 | 136.37 | 6.62 | 5.84–7.51c | 1.13 | 0.99–1.28 |
| Every 1 component increase |  |  |  | 2.1 | 2.07–2.13c | 1.08 | 1.06–1.1c |
| *Hospitalization* | |  |  |  |  |  |  |
| Number of frailty components |  |  |  |  |  |  |  |
| 0 | 156,130 | 1,238,294.32 | 126.08 | 1 | – | 1 | – |
| 1 | 41,764 | 201,949.25 | 206.8 | 1.61 | 1.59–1.63c | 1.07 | 1.06–1.08c |
| 2 | 6,618 | 14,939.54 | 442.99 | 3.27 | 3.19–3.35c | 1.18 | 1.15–1.22c |
| ≥ 3 | 669 | 895.23 | 747.29 | 5.22 | 4.84–5.63c | 1.28 | 1.19–1.39c |
| Every 1 component increase |  |  |  | 1.69 | 1.68–1.71c | 1.08 | 1.07–1.09c |
| *ICU admission* |  |  |  |  |  |  |  |
| Number of frailty components |  |  |  |  |  |  |  |
| 0 | 34,969 | 1,550,297.52 | 22.56 | 1 | – | 1 | – |
| 1 | 12,937 | 280,263.99 | 46.16 | 2.04 | 2.00–2.08c | 1.05 | 1.03–1.08c |
| 2 | 2,763 | 25,804.2 | 107.08 | 4.69 | 4.51–4.88c | 1.16 | 1.11–1.21c |
| ≥ 3 | 333 | 1,859.25 | 179.1 | 7.76 | 6.97–8.65c | 1.13 | 1.01–1.26e |
| Every 1 component increase |  |  |  | 2.08 | 2.05–2.11c | 1.06 | 1.04–1.08c |
| *Using preceding 1 years of DM diagnosis* | |  |  |  |  |  |  |
| *Mortality* | |  |  |  |  |  |  |
| Number of frailty components |  |  |  |  |  |  |  |
| 0 | 32,530 | 1,709,824.16 | 19.03 | 1 | – | 1 | – |
| 1 | 9,665 | 211,284.13 | 45.74 | 2.41 | 2.35–2.46c | 1.06 | 1.03–1.08c |
| 2 | 1,572 | 13,303.04 | 118.17 | 6.22 | 5.91–6.54c | 1.11 | 1.05–1.17d |
| ≥ 3 | 175 | 872.15 | 200.65 | 10.6 | 9.12–12.27c | 1.04 | 0.9–1.21 |
| Every 1 component increase |  |  |  | 2.4 | 2.37–2.45c | 1.05 | 1.03–1.07c |
| *Cardiovascular events* | |  |  |  |  |  |  |
| Number of frailty components |  |  |  |  |  |  |  |
| 0 | 34,960 | 1,640,875.58 | 21.31 | 1 | – | 1 | – |
| 1 | 8,860 | 195,018.87 | 45.43 | 2.12 | 2.07–2.17c | 1.09 | 1.06–1.12c |
| 2 | 1,277 | 11,084.03 | 115.21 | 5.29 | 5.00–5.59c | 1.2 | 1.13–1.27c |
| ≥ 3 | 112 | 657.62 | 170.31 | 7.68 | 6.38–9.24c | 1.18 | 0.98–1.42 |
| Every 1 component increase |  |  |  | 2.17 | 2.13–2.2c | 1.09 | 1.07–1.11c |
| *Hospitalization* | |  |  |  |  |  |  |
| Number of frailty components |  |  |  |  |  |  |  |
| 0 | 171,054 | 1,307,685.43 | 130.81 | 1 | – | 1 | – |
| 1 | 30,556 | 141,696.33 | 215.64 | 1.62 | 1.60–1.64c | 1.07 | 1.06–1.09c |
| 2 | 3,293 | 6,376.3 | 516.44 | 3.62 | 3.50–3.75c | 1.21 | 1.16–1.25c |
| ≥ 3 | 278 | 320.28 | 867.99 | 5.78 | 5.15–6.50c | 1.23 | 1.09–1.39d |
| Every 1 component increase |  |  |  | 1.7 | 1.69–1.72c | 1.08 | 1.07–1.09c |
| *ICU admission* |  |  |  |  |  |  |  |
| Number of frailty components |  |  |  |  |  |  |  |
| 0 | 39,425 | 1,648,382.79 | 23.92 | 1 | – | 1 | – |
| 1 | 9,976 | 197,637.33 | 50.48 | 2.1 | 2.06–2.15c | 1.05 | 1.03–1.08c |
| 2 | 1,454 | 11,505.04 | 126.38 | 5.2 | 4.94–5.48c | 1.11 | 1.05–1.17d |
| ≥ 3 | 357 | 699.79 | 210.06 | 8.52 | 7.25–10.02c | 1.05 | 0.89–1.24 |
| Every 1 component increase |  |  |  | 2.16 | 2.12–2.19c | 1.05 | 1.03–1.07c |

a per 1000 person-year

b Adjusted for demographic profiles, comorbidities, aDSCI, and medications

c *p* < 0.001

d *p* < 0.01

e *p* < 0.05

CI, confidence interval; DM, diabetes mellitus; HR, hazard ratio; ICU, intensive care unit
